# Supplementary material for: A Stepwise Data Interpretation Process For Renal Amyloidosis Subtyping by LMD-MS
Source: Research Square preprint supplement (doi:10.21203/rs.3.rs-917392/v1), 2021-10-13
Supplement: Supplementary file 1 [file 66a00f5955e1d28d4c47b7e0.xlsx]

## Sheet: Suppmentary Table 1
	Subtype	Igκ	IgG	SAA1	GELS	LECT2	TTHY	FIBA	FIBB	FIBG	APOA1	LYSC	CYTC	B2MG	APOA2	APOC2	APOC3	IgA	IgM	Igλ
F002306_AM0149_ALκ	ALκ	30.0118	11.3203	0.131631	3.15914		1.31631	4.08056	3.4224	3.94893	4.21219	1.44794		0.131631	0.263262		0.263262	0.263262	0.658155	0.921416
F002321_AM0139_ALκ	ALκ	7.33229	4.52418		3.90016		0.624025	1.56006	1.56006	1.87207	2.02808	1.09204	0.312012	0.312012				0.156006	0.156006	3.27613
F002328_KB2102794V_ALκ	ALκ	23.7417	3.48211		2.849		2.21589	0.949668	3.48211	2.53245	3.16556	1.26622						1.26622	3.48211	1.26622
F002332_KB2103521_ALκ	ALκ	25.2	1.2		2.8			0.4			2.8
F002344_KB2104351_ALκ	ALκ	16.0808	3.4904		3.36574		1.62054	13.7123	9.97258	8.97532	5.73423	0.249314			0.249314		0.373972	2.11917	8.97532	1.37123
F002347_KB2105237_ALκ	ALκ	10.8878	6.42099		3.76884		0.697934	2.79174	2.79174	3.2105	5.58347	0.41876			0.41876		0.41876	2.79174	1.25628	0.977108
F002348_KB2105568_ALκ	ALκ	22.1377	4.61768		3.8028		2.30884	5.43257	5.02513	4.07443	6.24745	0.271628		0.135814	0.271628		0.679071	0.814885	2.30884	0.679071
F002349_KB2105969_ALκ	ALκ	11.6249	2.68268		3.06592		1.02197	4.21564	3.44916	3.5769	3.06592	0.38324		0.127747			0.127747	1.14972	0.38324	0.638733
F002350_KB2106547_ALκ	ALκ	14.3615	2.98277		2.31993		0.552364	2.65135	1.98851	2.20946	2.4304	0.883783		0.220946				0.883783	0.552364	0.552364
F002353_KB2105154_ALκ	ALκ	32.0794	4.96467		3.05518		2.10044	2.48234	2.48234	1.52759	8.78365	0.381898	0.190949	0.190949	0.190949		0.572847	0.954745	0.381898	0.954745
F002366_KB2107833_ALκ	ALκ	14.2996	9.857		3.74844		1.38831	7.35805	8.88519	5.27558	5.96973	0.971817		0.138831	0.416493			4.72026	5.8309	2.36013
F002402_KB2109459_ALκ	ALκ	17.1233	12.8425		3.71005		1.42694	15.6963	9.13242	6.84932	4.7089	0.856164	0.285388	0.142694	0.142694		0.142694	2.4258	0.856164	0.71347
F002410_KB2111203_ALκ	ALκ	12.662	0.904432		5.12511			0.904432	2.7133	2.7133	1.20591			0.301477					0.602954	0.301477
F002218_KB2103060_AH(IgG)	AH(IgG)	4.53834	10.6416		4.22535		0.469484	2.19092	3.12989	2.34742	2.66041	0.312989						0.938967	6.41628	2.50391
F002367_KB2108023_AH(IgG)	AH(IgG)	3.82384	7.51582		3.16456		0.131857	3.16456	3.0327	2.90084	2.24156	0.263713		0.131857				0.131857	0.131857	1.71414
F002369_KB2112651_AH(IgG)	AH(IgG)	5.79441	11.8206		2.20188		0.231777	8.45984	7.8804	6.9533	4.28787	0.231777		0.115888	0.231777		0.231777	1.73832	2.66543	1.9701
F002143_KB2028012_AA	AA	11.6487	15.5914	81.7204	3.40502		0.179211	5.19713	3.40502	2.86738	6.63082	0.896057			0.537634		0.358423	4.12186	3.04659	4.83871
F002512_KB1623858_AA	AA	3.10209	6.48618	14.6644	3.94811			8.31923	8.03723	5.78116	3.80711	0.70502		0.282008				2.39707	1.55104	1.26904
F001962_KB2020231_AM0038_AGel	AGel	8.3818	6.50017		17.961		2.22374	2.56586	1.71057	2.05269	4.44749	1.53951		0.342114	0.513171		0.171057	2.3948	1.1974	1.53951
F002164_KB2100482_AM0083_AGel	AGel	5.08429	5.21809		14.4501		0.668986	6.15467	5.08429	5.48568	3.07733	0.93658	0.133797	0.133797	0.133797		0.133797	0.668986	6.42226	1.07038
F002215_KB2102684_AM0104_AGel	AGel	7.05946	5.83763	0.135759	30.2742		1.35759	2.85094	2.9867	4.07277	6.24491	0.814553	0.135759	0.135759	0.271518		0.271518	1.90062	2.17214	0.950312
F002175_K2002479_ALECT2	ALECT2	4.03565	3.69934		0.672608	1.00891	2.18598	0.84076	1.17706	1.17706	2.18598	3.19489	0.168152					1.34522		0.672608
F002273_KB2108437_AM0123I_ALECT2	ALECT2	7.76197	9.77433		2.1561	2.01236	0.43122	2.29984	2.01236	2.44358	1.86862	1.72488		0.28748				4.02472		2.44358
F002372_KB2109326_ALECT2	ALECT2	1.56525	2.15222		1.36959	1.76091		0.978282	0.782626	1.66308	1.66308	0.782626	0.0978282	0.391313				0.489141		0.586969
F002481_K2106574_AM0253_ATTR	ATTR	4.2054	5.09075		3.65206		13.9442	4.53741	4.2054	3.98406	4.53741	0.110668		0.110668	0.664011		0.221337	2.54537	4.64807	2.43471
F002346_KB2104523_AHL(IgGλ)	AHL(IgGλ)	0.43315	13.1389		1.58822		1.58822	1.44383	1.15507	1.01068	2.45452	1.87699	0.144383	0.144383			0.144383			4.04274
F002351_KB2106666_AHL(IgGλ)	AHL(IgGλ)	3.31082	4.76758		5.03245		0.92703	2.25136	2.78109	2.11892	4.37028	0.264866		0.132433	0.132433		0.264866	1.58919	1.32433	10.7271
F002387_KB2102788_AHL(IgGλ)	AHL(IgGλ)	0.807972	15.7555		1.48128		2.15459	1.21196	0.538648	0.942634	5.6558	2.55858	0.67331	0.538648	0.134662		0.538648	0.134662		6.86776
F002391_KB2110048_AHL(IgGλ)	AHL(IgGλ)	3.58744	5.50929		5.12492		0.384369	2.04997	1.6656	1.92184	3.97181	0.256246		0.256246				1.15311	0.640615	3.3312
F002409_KB2110356_AHL(IgGλ)	AHL(IgGλ)	1.66459	8.73908		4.85504		0.693577	3.88403	4.30018	3.19046	2.91303	0.416146		0.277431	0.138715			0.693577	0.832293	4.57761
F002331_KB2103268_AHL(IgAλ)	AHL(IgAλ)	0.942359	5.49709		4.55474		0.15706	0.942359	1.09942	1.5706	0.785299							2.3559	0.942359	2.04178
F002388_KB2103339_AHL(IgAλ)	AHL(IgAλ)	4.50789	4.88355		4.50789		0.500877	2.50438	2.50438	2.6296	3.63135	0.626096		0.125219				5.13398	0.751315	4.75833
F002407_KB2110191G_AHL(IgAλ)	AHL(IgAλ)	1.98518	3.30863		4.23504		1.05876	7.94071	5.95553	6.48491	6.61726	0.132345		0.132345	0.397035		0.26469	6.35257	0.529381	4.89677
F002251_KB2101229BV_ALλ	ALλ	1.69635	10.3478		4.07125		0.339271	0.169635			6.78541	1.35708							0.169635	8.82103
F002253_KB2101427_ALλ	ALλ	7.78703	15.393		3.80297		1.62984	3.98406	3.44078	4.34625	7.24375	0.905469			0.181094			2.71641	2.17313	11.59
F002265_KB2106639G_ALλ	ALλ	3.37669	6.003		3.50175		0.250125	2.37619	2.50125	3.12656	2.25113	0.875438		0.375188	0.375188			0.375188	0.50025	14.6323
F002277_AM0125_ALλ	ALλ	4.08749	2.4304		4.19797		0.883783	2.98277	3.53513	3.31418	5.85506	0.441891		0.441891	0.331418		0.441891	4.08749	1.43615	6.5179
F002292_KB2108091_AM0133_ALλ	ALλ	4.49186	3.79001		3.08815		0.140371	0.842223	1.12296	1.40371	1.82482	0.280741		0.280741				1.12296	0.140371	3.93038
F002296_KB2101255_ALλ	ALλ	4.22255	16.3934		1.7387		1.98708	5.46448	6.70641	5.71287	5.71287							0.248385	0.496771	19.8708
F002302_KB2102398_ALλ	ALλ	8.10015	6.33284		3.09278		1.03093	10.4566	7.95287	7.06922	7.51105	0.589102		0.147275	0.294551		0.736377	3.38733	3.97644	7.06922
F002330_KB2103241_ALλ	ALλ	3.10252	3.24355		4.37174		0.705119	1.83331	1.83331	1.55126	1.83331	0.141024		0.282048				2.9615	0.705119	6.06402
F002333_KB2104164_ALλ	ALλ	3.3871	2.90323		4.03226		0.645161	1.29032	2.09677	1.93548	1.93548	0.645161		0.16129				5		7.58065
F002334_KB2104317_ALλ	ALλ	6.45549	7.056		4.65396		0.900766	12.0102	9.75829	8.40715	4.95421	0.60051		0.150128	0.300255		0.60051	2.40204	8.7074	11.1094
F002358_KB2112283_AM0177_ALλ	ALλ	3.31629	12.1597	0.138179	4.00719		0.690894	4.00719	4.14536	3.17811	3.31629	0.690894		0.138179				1.51997	0.552715	7.46166
F002381_AM0189_ALλ	ALλ	4.66853	2.56769	0.116713	3.73483		1.05042	5.48553	5.71895	4.90196	4.90196	0.233427			0.466853	0.116713	0.233427	3.73483	2.68441	4.78525
F002384_KB2114387_AM0196_ALλ	ALλ	4.99144	4.99144		2.85225		1.85396	0.713063	0.570451	1.1409	3.70793	2.2818	0.427838	0.285225			0.285225	2.2818	0.713063	9.41244
F002389_KB2103352_ALλ	ALλ	2.06327	1.20358		2.92297		1.03164	3.26685	4.12655	2.40715	3.26685	0.515818					0.171939	1.37552	4.47043	12.0358
F002398_KB2113726_AM0201_ALλ	ALλ	3.47606	4.26608		3.95007		2.21204	0.158003	0.316006	0.474009	10.4282	0.948017		0.158003			0.948017	0.632011	0.158003	10.4282
F002404_KB2109644_ALλ	ALλ	2.68853	3.36067	0.40328	2.0164		0.672133	2.55411	1.88197	2.55411	2.68853	1.07541	0.134427	0.134427			0.134427	1.07541	0.268853	4.43608
F002406_KB2110037_ALλ	ALλ	3.69049	4.30557		3.19843		0.738098	3.93652	4.67462	4.18256	3.93652	0.246033		0.246033	0.123016			3.81351	1.4762	4.55161
